# Supplementary material for: Molecular serotyping of Haemophilus parasuis isolated from diseased pigs and the relationship between serovars and pathological patterns in Taiwan
Source: PeerJ. 2018 Nov 29;6:e6017. doi: 10.7717/peerj.6017 (PMC6275120; doi:10.7717/peerj.6017)
Supplement: Supplemental Information 17 [file peerj-06-6017-s017.xlsx]

## Sheet: 工作表1
Date	Case No.	Lesion	Herd	County	Age (week)	Period	Isolate No.	Different serovar in one herd	Serovar	Pathological examination	Pathological H. parasuis infected lesion	Meningeal lesion	Pleural lesion	Epicardial lesion	Peritoneal lesion	Synovial cavity lesion	Bronchopneumonia	H. parasuis positive lung lesion	Pasteurella multocida infection	Streptococcus sp. infection	Porcine reproductive and respiratory syndrome	Salmonellosis	Porcine epidemic diarrhea
2013-08-28	S-1028	Mn	H1	Pingtung	6	Nursery	1		5	Y	Y	Y	N	N	Y	N	N	N	N	N	N	N	N
2013-09-06	102-352	Pc	H2	Pingtung	5	Nursery	2		2	Y	Y	Y	Y	Y	Y	N	N	N	N	N	N	N	N
2013-11-01	102-440	Mn	H3	Pingtung	6	Nursery	3		4	N
2013-11-01	102-440	Pc	H3	Pingtung	6				4
2014-01-20	103-059	Mn	H4	Yunlin	Unknown	Unknown	4		MSNT group 1	N
2014-01-20	103-059	Pl	H4	Yunlin	Unknown				MSNT group 1
2014-01-20	103-059	Jt	H4	Yunlin	Unknown				MSNT group 1
2014-05-19	103-353	Pl	H5	Pingtung	7	Nursery	5		4	N
2014-10-28	S-1608	PL	H6	Pingtung	5	Nursery	6		4	Y	Y	Y	Y	Y	N	N	Y	N	N	N	Y	Y	N
2014-10-28	S-1608	PC	H6	Pingtung	5				4		Y
2014-11-04	S-1612	MN	H7	Pingtung	7	Nursery	7		MSNT group 1	Y	Y	Y	Y	Y	Y	N	Y	N	Y	N	Y	Y	N
2014-11-06	S-1613	PC	H8	Pingtung	7	Nursery	8		4	Y	Y	N	Y	Y	Y	N	Y	N	N	N	Y	N	N
2014-12-30	S-1691	Mn	H9	Pingtung	7	Nursery	9		MSNT group 1	Y	Y	Y	Y	Y	Y	N	Y	N	N	N	Y	N	N
2014-12-30	S-1691	Pl	H9	Pingtung	7				MSNT group 1
2015-01-08	104-029	Lu	H10	Pingtung	5	Nursery	10		4	N
2015-01-12	104-045	Pt	H11	Pingtung	6	Nursery	11		4	N
2015-01-12	104-045	Pc	H11	Pingtung	6				4
2015-01-12	104-045	Pl	H11	Pingtung	6				4
2015-02-03	104-107	PL	H12	Pingtung	10	Nursery	12		5	Y	Y	N	Y	N	Y	Y	Y	N	N	Y	Y	N	N
2015-02-03	104-108	LU	H12	Pingtung	4	Nursery			5	Y	Y	N	Y	Y	Y	Y	Y	Y	N	N	Y	N	N
2015-02-03	104-108	PL	H12	Pingtung	4				5		Y
2015-02-03	104-108	PT	H12	Pingtung	4				5		Y
2015-02-03	104-108	JT	H12	Pingtung	4				5		Y
2015-02-06	104-116	Lu	H13	Pingtung	7	Nursery	13		MSNT group 2	Y	Y	N	Y	Y	N	N	Y	Y	N	N	Y	N	N
2015-02-24	104-152	PC	H14	Tainan	5	Nursery	14		MSNT group 2	Y	Y	Y	Y	Y	Y	N	Y	N	N	N	N	N	N
2015-02-24	104-177	PL	H15	Pingtung	3	Suckling	15		5	Y	Y	N	Y	N	N	N	Y	N	N	N	Y	N	N
2015-03-05	104-214	PT	H16	Tainan	7	Nursery	16		MSNT group 2	Y	Y	Y	Y	Y	Y	N	Y	N	N	N	Y	N	N
2015-03-05	104-214	PC	H16	Tainan	7				MSNT group 2		Y
2015-03-10	104-235	Lu	H17	Pingtung	5	Nursery	17		MSNT group 2	Y	Y	Y	Y	N	Y	N	Y	Y	N	N	Y	N	N
2015-04-09	104-327	PL	H18	Tainan	5	Nursery	18		5	N
2015-04-13	104-354	LU	H19	Pingtung	10	Nursery	19		4	N
2015-04-24	104-391	JT	H20	Tainan	6	Nursery	20		MSNT group 2	Y	Y	N	Y	N	N	Y	Y	N	N	N	Y	N	Y
2015-05-06	104-418	MN	H21	Pingtung	10	Nursery	21		MSNT group 2	Y	Y	Y	Y	Y	Y	Y	Y	N	N	N	N	N	N
2015-05-06	104-418	PC	H21	Pingtung	10				MSNT group 2		Y
2015-05-06	104-418	PL	H21	Pingtung	10				MSNT group 2		Y
2015-05-06	104-418	PT	H21	Pingtung	10				MSNT group 2		Y
2015-05-06	104-418	JT	H21	Pingtung	10				MSNT group 2		Y
2015-06-04	104-526	MN	H22	Pingtung	7	Nursery	22		5	N
2015-06-04	104-526	PC	H22	Pingtung	7				5
2015-06-04	104-526	PT	H22	Pingtung	7				5
2015-06-12	104-570	PL	H23	Pingtung	5	Nursery	23		4	Y	Y	N	Y	Y	Y	Y	Y	N	N	N	Y	N	N
2015-06-12	104-570	PC	H23	Pingtung	5				4		Y
2015-07-27	104-780	LU	H24	Yunlin	3	Suckling	24		4	N
2015-07-30	104-797	JT	H25	Pingtung	6	Nursery	25		4	Y	Y	N	Y	Y	Y	Y	Y	N	N	Y	Y	N	N
2015-07-30	104-797	PL	H25	Pingtung	6				4		Y
2015-07-30	104-797	PC	H25	Pingtung	6				4		Y
2015-08-04	104-817	Lu	H26	Pingtung	8	Nursery	26		4	Y	Y	N	N	N	N	N	Y	Y	N	N	Y	N	N
2015-08-14	104-888	JT	H27	Pingtung	6	Nursery	27		5	Y	Y	Y	Y	Y	Y	Y	Y	N	N	N	Y	N	N
2015-08-14	104-888	PL	H27	Pingtung	6				5		Y
2015-08-14	104-888	LU	H27	Pingtung	6				5		Y
2015-08-31	104-955-5	PL	H28	Yunlin	Unknown	Unknown	28		MSNT group 2	N
2015-09-04	104-982	PL	H29	Pingtung	6	Nursery	29		4	Y	Y	Y	Y	N	Y	N	Y	N	N	N	Y	Y	N
2015-09-04	104-982	PT	H29	Pingtung	6				4		Y
2015-09-05	104-988	PC	H30	Pingtung	5	Nursery	30		MSNT group 2	N
2015-09-07	104-1001	PL	H31	Pingtung	4	Nursery	31		5	Y	Y	N	Y	Y	Y	N	Y	N	N	N	Y	N	N
2015-09-07	104-1001	PC	H31	Pingtung	4				5		Y
2015-09-07	104-1001	PT	H31	Pingtung	4				5		Y
2015-09-09	104-1027	PC	H32	Pingtung	4	Nursery	32		14	Y	Y	Y	Y	Y	Y	N	Y	N	N	N	Y	N	N
2015-09-10	104-1029	Lu	H33	Pingtung	6	Nursery	33	1	MSNT group 2	N
2015-09-10	104-1031	Lu	H33	Pingtung	6	Nursery			MSNT group 2	N
2015-09-10	104-1031	PL	H33	Pingtung	6		34	1	5
2015-09-10	104-1031	PC	H33	Pingtung	6				5
2015-09-10	104-1031	Pt	H33	Pingtung	6				5
2015-09-14	104-1053	PL	H34	Pingtung	Unknown	Unknown	35		5	N
2015-09-22	104-1109	Lu	H35	Pingtung	7	Nursery	36		5	Y	Y	Y	Y	N	N	N	Y	Y	N	N	Y	N	N
2015-10-01	104-1146	PC	H36	Pingtung	6	Nursery	37		5	Y	Y	N	Y	Y	Y	Y	Y	N	N	N	N	N	N
2015-10-01	104-1146	JT	H36	Pingtung	6				5		Y
2015-10-05	104-1168	Lu	H37	Pingtung	6	Nursery	38	1	4	Y	Y	N	Y	Y	N	N	Y	Y	N	N	Y	N	N
2015-10-05	104-1168	Lu	H37	Pingtung	6		39	1	MSNT group 1		Y
2015-10-26	104-1297	PL	H38	Pingtung	9	Nursery	40		4	N
2015-10-26	104-1297	Lu	H38	Pingtung	9				4
2015-10-26	104-1301	PC	H38	Pingtung	4	Nursery			4	N
2015-12-26	104-1609	PC	H39	Pingtung	7	Nursery	41		4	N
2015-12-26	104-1612	PL	H39	Pingtung	7	Nursery			4	N
2015-12-28	104-1614	LU	H40	Kaohsiung	7	Nursery	42		MSNT group 1	Y	Y	N	Y	N	N	Y	Y	Y	N	N	N	Y	N
2015-12-28	104-1616	PC	H41	Pingtung	7	Nursery	43		4	Y	Y	Y	Y	Y	Y	N	Y	Y	N	N	Y	N	N
2016-01-08	105-025	LU	H42	Pingtung	7	Nursery	44		MSNT group 1	Y	Y	N	N	N	N	N	Y	Y	N	N	Y	Y	N
2016-01-08	105-044	Lu	H43	Pingtung	4	Nursery	45		4	Y	Y	N	Y	Y	Y	Y	Y	Y	N	N	N	N	N
2016-01-08	105-044	JT	H43	Pingtung	4				4		Y
2016-01-08	105-044	PL	H43	Pingtung	4				4		Y
2016-01-08	105-044	PT	H43	Pingtung	4				4		Y
2016-01-14	105-029	Lu	H44	Changhua	10	Nursery	46		MSNT group 1	N
2016-01-21	105-073	PC	H45	Pingtung	7	Nursery	47		5	Y	Y	N	Y	Y	Y	Y	Y	N	Y	N	Y	N	N
2016-01-25	105-114	Lu	H46	Pingtung	10	Nursery	48		5	Y	Y	Y	Y	N	N	N	Y	Y	N	N	Y	N	N
2016-02-15	105-187	MN	H47	Tainan	7	Nursery	49	1	14	N
2016-02-15	105-188	PL	H47	Tainan	7	Nursery	50	1	5	N
2016-02-15	105-188	Lu	H47	Tainan	7				5
2016-02-15	105-197	PL	H48	Pingtung	2	Suckling	51		5	Y	Y	Y	Y	N	N	N	Y	Y	N	N	Y	N	N
2016-02-17	105-232	PT	H49	Pingtung	8	Nursery	52		4	N
2016-02-19	105-247	PL	H50	Pingtung	5	Nursery	53		5	Y	Y	Y	Y	Y	Y	N	Y	N	N	N	Y	N	N
2016-02-19	105-247	PC	H50	Pingtung	5				5		Y
2016-02-19	105-247	PT	H50	Pingtung	5				5		Y
2016-02-19	105-247	Lu	H50	Pingtung	5				5		Y
2016-02-23	105-262	LU	H51	Yunlin	7	Nursery	54		4	N
2016-03-29	105-485	Lu	H52	Yunlin	6	Nursery	55		5	N
2016-04-01	105-519	PL	H53	Pingtung	4	Nursery	56		5	Y	Y	N	Y	N	N	Y	Y	N	N	Y	Y	N	N
2016-04-12	105-557	Lu	H54	Tainan	8	Nursery	57		4	Y	Y	N	Y	N	N	N	Y	Y	N	N	N	N	N
2016-04-18	105-598	LU	H55	Kaohsiung	6	Nursery	58		4	N
2016-04-18	105-598	PC	H55	Kaohsiung	6				4
2016-04-18	105-598	PT	H55	Kaohsiung	6				4
2016-04-26	105-643	PL	H56	Kaohsiung	5	Nursery	59		5	N
2016-04-26	105-648	PL	H57	Kaohsiung	6	Nursery	60		5	Y	Y	N	Y	Y	Y	N	Y	Y	N	N	Y	Y	N
2016-04-26	105-648	PC	H57	Kaohsiung	6				5		Y
2016-04-26	105-648	Lu	H57	Kaohsiung	6				5		Y
2016-06-08	105-912	JT	H58	Pingtung	6	Nursery	61		MSNT group 4	Y	Y	Y	Y	Y	Y	Y	Y	N	N	N	Y	N	N
2016-06-08	105-912	MN	H58	Pingtung	6				MSNT group 4		Y
2016-06-08	105-912	PT	H58	Pingtung	6				MSNT group 4		Y
2016-06-08	105-912	PL	H58	Pingtung	6				MSNT group 4		Y
2016-06-08	105-914	MN	H58	Pingtung	6	Nursery			MSNT group 4	Y	Y	Y	Y	Y	Y	Y	Y	N	N	N	N	N	N
2016-06-08	105-914	PT	H58	Pingtung	6				MSNT group 4		Y
2016-06-22	105-976	Lu	H59	Pingtung	10	Nursery	62		MSNT group 3	Y	Y	Y	Y	N	N	Y	Y	Y	N	Y	Y	Y	N
2016-07-05	105-1052	PL	H60	Pingtung	6	Nursery	63		4	Y	Y	Y	Y	Y	Y	N	Y	N	N	N	Y	Y	N
2016-07-05	105-1052	PC	H60	Pingtung	6				4		Y
2016-07-11	105-1071	PT	H61	Pingtung	5	Nursery	64		5	Y	Y	Y	Y	Y	Y	N	Y	Y	N	Y	Y	Y	N
2016-07-11	105-1071	Lu	H61	Pingtung	5				5		Y
2016-07-11	105-1072	PT	H61	Pingtung	5	Nursery			5	Y	Y	Y	Y	Y	Y	N	Y	Y	N	N	Y	Y	N
2016-07-11	105-1072	Lu	H61	Pingtung	5				5		Y
2016-07-12	105-1093	Lu	H62	Pingtung	8	Nursery	65		MSNT group 2	Y	Y	Y	Y	N	N	N	Y	Y	N	N	N	N	N
2016-07-14	105-1111	PL	H63	Pingtung	12	Nursery	66		MSNT group 2	Y	Y	Y	Y	Y	Y	N	Y	Y	N	N	Y	N	N
2016-07-14	105-1111	PC	H63	Pingtung	12				MSNT group 2		Y
2016-07-14	105-1111	PT	H63	Pingtung	12				MSNT group 2		Y
2016-07-14	105-1111	Lu	H63	Pingtung	12				MSNT group 2		Y
2016-07-14	105-1112	MN	H63	Pingtung	10	Nursery			MSNT group 2	Y	Y	Y	Y	Y	Y	Y	Y	N	N	N	Y	N	N
2016-07-14	105-1112	PL	H63	Pingtung	10				MSNT group 2		Y
2016-07-14	105-1112	PC	H63	Pingtung	10				MSNT group 2		Y
2016-07-14	105-1112	PT	H63	Pingtung	10				MSNT group 2		Y
2016-07-14	105-1112	JT	H63	Pingtung	10				MSNT group 2		Y
2016-07-19	105-1153	Lu	H64	Pingtung	8	Nursery	67		4	Y	Y	Y	Y	N	N	N	Y	Y	N	N	Y	N	N
2016-07-19	105-1153	Lu	H64	Pingtung	8				4		Y
2016-07-20	105-1161	MN	H65	Kaohsiung	5	Nursery	68		5	Y	Y	Y	Y	Y	Y	N	Y	N	N	N	Y	N	N
2016-07-20	105-1163	MN	H65	Kaohsiung	5	Nursery			5	Y	Y	Y	Y	Y	Y	Y	Y	Y	N	N	Y	N	N
2016-07-20	105-1163	PL	H65	Kaohsiung	5				5		Y
2016-07-20	105-1163	PT	H65	Kaohsiung	5				5		Y
2016-07-20	105-1163	JT	H65	Kaohsiung	5				5		Y
2016-07-20	105-1163	Lu	H65	Kaohsiung	5				5		Y
2016-07-22	105-1183	PC	H66	Pingtung	9	Nursery	69		5	Y	Y	N	Y	Y	N	N	Y	N	N	N	Y	N	N
2016-07-28	105-1198	PL	H67	Pingtung	6	Nursery	70	1	4	Y	Y	N	Y	Y	Y	N	Y	N	N	N	N	Y	N
2016-07-28	105-1198	PT	H67	Pingtung	6				4		Y
2016-07-28	105-1199	MN	H67	Pingtung	10	Nursery	71	1	5	Y	Y	Y	Y	Y	N	N	Y	Y	Y	Y	N	Y	N
2016-07-28	105-1199	PL	H67	Pingtung	10				5		Y
2016-07-28	105-1199	PC	H67	Pingtung	10				5		Y
2016-07-28	105-1199	PT	H67	Pingtung	10				5		Y
2016-07-28	105-1199	Lu	H67	Pingtung	10				4		Y
2016-08-02	105-1227	Lu	H68	Pingtung	6	Nursery	72		5	Y	Y	N	N	N	N	N	Y	Y	N	N	Y	N	N
2016-08-02	105-1268	Lu	H69	Pingtung	4	Nursery	73		MSNT group 1	Y	Y	Y	Y	N	N	Y	Y	Y	N	N	N	N	N
2016-08-12	105-1319	PL	H70	Tainan	9	Nursery	74		MSNT group 1	N
2016-08-12	105-1319	Lu	H70	Tainan	9				MSNT group 1
2016-08-12	105-1323	PC	H71	Pingtung	13	Growing	75		MSNT group 1	N
2016-08-18	105-1345	PT	H72	Pingtung	8	Nursery	76	1	4	Y	Y	Y	Y	Y	Y	N	Y	Y	N	N	Y	N	N
2016-08-18	105-1345	Lu	H72	Pingtung	8				4		Y
2016-08-18	105-1346	PL	H72	Pingtung	8	Nursery	77	1	5	Y	Y	Y	Y	Y	Y	N	Y	N	Y	N	Y	N	N
2016-08-18	105-1346	PC	H72	Pingtung	8				5		Y
2016-08-18	105-1346	PT	H72	Pingtung	8				5		Y
2016-08-18	105-1350	PL	H73	Yunlin	6	Nursery	78		4	N
2016-08-18	105-1350	Lu	H73	Yunlin	6				4
2016-08-30	105-1428	PL	H74	Pingtung	7	Nursery	79		5	N
2016-08-30	105-1428	Lu	H74	Pingtung	7				5
2016-08-30	105-1429	PC	H74	Pingtung	7	Nursery			5	N
2016-08-30	105-1429	PT	H74	Pingtung	7				5
2016-08-30	105-1429	Lu	H74	Pingtung	7				5
2016-08-30	105-1430	PL	H74	Pingtung	7	Nursery			5	N
2016-08-30	105-1430	Lu	H74	Pingtung	7				5
2016-10-11	105-1650	PL	H75	Pingtung	8	Nursery	80	1	MSNT group 3	Y	Y	Y	Y	Y	Y	N	Y	Y	N	N	Y	N	N
2016-10-11	105-1650	PC	H75	Pingtung	8				MSNT group 3		Y
2016-10-11	105-1650	PT	H75	Pingtung	8				MSNT group 3		Y
2016-10-11	105-1650	Lu	H75	Pingtung	8		81	1	4		Y
2016-10-12	105-1656	PT	H76	Pingtung	8	Nursery	82		5	N
2016-10-12	105-1657	MN	H76	Pingtung	8	Nursery			5	N
2016-10-12	105-1657	PC	H76	Pingtung	8				5
2016-10-12	105-1657	PT	H76	Pingtung	8				5
2016-10-17	105-1688	Lu	H77	Pingtung	6	Nursery	83		4	N
2016-10-17	105-1689	Lu	H77	Pingtung	6	Nursery			4	N
2016-10-18	105-1703	MN	H78	Pingtung	13	Growing	84		5	Y	Y	Y	Y	Y	Y	Y	Y	N	N	N	Y	N	N
2016-10-18	105-1703	JT	H78	Pingtung	13				5		Y
2016-10-24	105-1754	MN	H79	Pingtung	6	Nursery	85		MSNT group 2	Y	Y	Y	Y	Y	Y	N	Y	N	N	N	N	N	N
2016-10-24	105-1756	Lu	H80	Pingtung	9	Nursery	86	1	5	Y	Y	Y	Y	N	N	N	Y	Y	N	Y	Y	N	N
2016-10-24	105-1757	Lu	H80	Pingtung	9	Nursery			5	Y	Y	Y	Y	Y	N	N	Y	Y	N	N	Y	N	N
2016-10-24	105-1759	PL	H80	Pingtung	8	Nursery	87	1	4	N
2016-10-24	105-1759	PC	H80	Pingtung	8				4
2016-10-27	105-1790	MN	H81	Pingtung	7	Nursery	88		5	Y	Y	Y	Y	Y	Y	Y	Y	Y	N	N	N	N	N
2016-10-27	105-1790	PL	H81	Pingtung	7				5		Y
2016-10-27	105-1790	PC	H81	Pingtung	7				5		Y
2016-10-27	105-1790	JT	H81	Pingtung	7				5		Y
2016-10-27	105-1790	Lu	H81	Pingtung	7				5		Y
2016-11-04	105-1842	Lu	H82	Pingtung	13	Growing	89		5	Y	Y	Y	Y	Y	Y	N	Y	Y	N	Y	N	N	N
2016-11-04	105-1844	Lu	H82	Pingtung	13	Growing			5	Y	Y	Y	Y	N	Y	N	Y	Y	N	N	N	N	N
2016-11-07	105-1847	Lu	H83	Pingtung	7	Nursery	90		5	Y	Y	Y	Y	Y	Y	N	Y	Y	Y	N	Y	Y	N
2016-11-07	105-1849	PL	H83	Pingtung	7	Nursery			5	Y	Y	N	Y	N	N	N	Y	N	Y	N	Y	Y	N
2016-11-14	105-1883	Lu	H84	Yunlin	2	Suckling	91		5	N
2016-11-14	105-1886	PL	H85	Pingtung	6	Nursery	92	1	MSNT group 2	Y	Y	N	Y	Y	Y	N	Y	Y	N	N	Y	Y	N
2016-11-14	105-1886	PC	H85	Pingtung	6				MSNT group 2		Y
2016-11-14	105-1886	Lu	H85	Pingtung	6		93	1	5		Y
2016-11-15	105-1898	Lu	H86	Kaohsiung	7	Nursery	94		5	Y	Y	N	Y	N	N	N	Y	Y	N	N	Y	N	N
2016-11-17	105-1914	Lu	H87	Pingtung	6	Nursery	95		4	Y	Y	Y	N	N	N	N	Y	Y	N	Y	Y	N	N
2016-11-21	105-1923	Lu	H88	Pingtung	4	Nursery	96		5	Y	Y	N	Y	N	Y	N	Y	Y	N	N	Y	Y	N
2016-11-22	105-1932	Lu	H89	Pingtung	7	Nursery	97		4	N
2016-11-22	105-1933	Lu	H89	Pingtung	7	Nursery			4	N
2016-11-22	105-1935	Lu	H90	Pingtung	7	Nursery	98		5	N
2016-11-23	105-1943	PL	H91	Pingtung	8	Nursery	99		5	Y	Y	N	Y	Y	Y	N	Y	Y	N	N	Y	N	N
2016-11-24	105-1951	PL	H92	Pingtung	8	Nursery	100		9	Y	Y	Y	Y	Y	Y	N	Y	N	N	N	Y	Y	N
2016-11-25	105-1959	PL	H93	Pingtung	Boar	Boar	101		4	N
2016-11-25	105-1959	JT	H93	Pingtung	Boar				4
2016-11-28	105-1973	PC	H94	Pingtung	4	Nursery	102		MSNT group 1	N
2016-11-28	105-1973	PT	H94	Pingtung	4				MSNT group 1
2016-11-30	105-2001	Lu	H95	Changhua	9	Nursery	103		5	N
2016-12-01	105-2003	PL	H96	Kaohsiung	7	Nursery	104		4	Y	Y	Y	Y	Y	Y	Y	Y	Y	N	N	N	N	N
2016-12-01	105-2003	Lu	H96	Kaohsiung	7				4		Y
2016-12-02	105-2021	PL	H97	Pingtung	3	Suckling	105		5	Y	Y	Y	Y	Y	Y	Y	Y	N	N	N	N	Y	N
2016-12-02	105-2021	PC	H97	Pingtung	3				5		Y
2016-12-02	105-2022	PL	H97	Pingtung	3	Suckling			5	Y	Y	N	Y	Y	Y	N	Y	Y	N	N	N	Y	N
2016-12-02	105-2022	PC	H97	Pingtung	3				5		Y
2016-12-02	105-2022	Lu	H97	Pingtung	3				5		Y
2016-12-02	105-2023	Lu	H97	Pingtung	3	Suckling			5	Y	Y	Y	N	N	N	N	Y	Y	N	Y	N	N	N
2016-12-07	105-2053	PL	H98	Pingtung	7	Nursery	106		MSNT group 2	Y	Y	N	Y	Y	Y	Y	Y	Y	N	N	Y	N	N
2016-12-07	105-2053	PC	H98	Pingtung	7				MSNT group 2		Y
2016-12-07	105-2053	JT	H98	Pingtung	7				MSNT group 2		Y
2016-12-07	105-2053	Lu	H98	Pingtung	7				MSNT group 2		Y
2016-12-12	105-2079	Lu	H99	Pingtung	4	Nursery	107		MSNT group 1	Y	Y	N	Y	N	N	Y	Y	Y	N	N	N	N	N
2016-12-12	105-2080	PL	H99	Pingtung	4	Nursery			MSNT group 1	Y	Y	Y	Y	N	Y	Y	Y	N	Y	Y	Y	Y	N
2016-12-12	105-2081	MN	H100	Pingtung	10	Nursery	108		MSNT group 1	Y	Y	Y	N	N	N	N	Y	Y	N	N	N	N	N
2016-12-12	105-2083	Lu	H101	Pingtung	4	Nursery	109		5	Y	Y	Y	Y	Y	Y	Y	Y	Y	N	N	Y	N	N
2016-12-13	105-2085	Lu	H102	Pingtung	8	Nursery			5	Y	Y	N	N	N	N	N	Y	Y	N	N	Y	N	N
2016-12-13	105-2086	PT	H102	Pingtung	8	Nursery			5	Y	Y	Y	Y	Y	Y	N	Y	N	N	Y	Y	N	N
2016-12-13	105-2086	Lu	H102	Pingtung	8		110		5		Y
2016-12-13	105-2091	Lu	H103	Pingtung	9	Nursery	111		5	Y	Y	N	Y	N	N	N	Y	Y	N	N	N	N	N
2016-12-14	105-2112	PT	H104	Pingtung	10	Nursery	112		MSNT group 1	Y	Y	Y	Y	N	Y	N	Y	N	N	N	N	N	N
2016-12-14	105-2113	Lu	H104	Pingtung	11	Nursery			MSNT group 1	Y	Y	Y	Y	Y	Y	Y	Y	Y	N	N	N	Y
2016-12-14	105-2113	JT	H104	Pingtung	11				MSNT group 1		Y
2016-12-14	105-2113	PC	H104	Pingtung	11				MSNT group 1		Y
2016-12-14	105-2113	MN	H104	Pingtung	11				MSNT group 1		Y
2016-12-14	105-2113	PT	H104	Pingtung	11				MSNT group 1		Y
2016-12-19	105-2131	Lu	H105	Kaohsiung	9	Nursery	113		MSNT group 1	Y	Y	Y	N	N	N	Y	Y	Y	N	N	N	Y	N
2016-12-19	105-2135	Lu	H106	Pingtung	9	Nursery	114		MSNT group 2	Y	Y	Y	N	N	Y	N	Y	Y	N	Y	N	N	N
2016-12-19	105-2140	JT	H107	Yunlin	16	Growing	115		4	Y	Y	Y	Y	Y	N	Y	Y	N	N	N	Y	Y	N
2016-12-19	105-2141	PC	H107	Yunlin	16	Growing			4	Y	Y	Y	Y	Y	N	N	Y	Y	N	N	Y	N	N
2016-12-19	105-2141	PL	H107	Yunlin	16				4		Y
2016-12-19	105-2141	Lu	H107	Yunlin	16				4		Y
2016-12-19	105-2142	Lu	H107	Yunlin	16	Growing			4	Y	Y	Y	Y	Y	Y	N	Y	Y	N	N	Y	N	N
2016-12-19	105-2142	PC	H107	Yunlin	16				4		Y
2016-12-19	105-2142	PT	H107	Yunlin	16				4		Y
2016-12-20	105-2169	Lu	H108	Tainan	5	Nursery	116		5	N
2016-12-21	105-2200	Lu	H109	Pingtung	6	Nursery	117		14	Y	Y	N	Y	Y	Y	Y	Y	Y	N	N	Y	Y	N
2016-12-22	105-2207	PT	H110	Changhua	6	Nursery	118		5	Y	Y	Y	Y	Y	Y	N	Y	N	N	N	Y	Y	N
2016-12-29	105-2252	Lu	H111	Pingtung	3	Suckling	119	1	4	Y	Y	N	Y	Y	Y	N	Y	Y	N	N	N	N	N
2016-12-29	105-2254	PC	H111	Pingtung	3	Suckling	120	1	1	N
2016-12-29	105-2258	Lu	H112	Kaohsiung	5	Nursery	121		MSNT group 1	N
2017-01-05	106-064	PL	H113	Yunlin	6	Nursery	122		MSNT group 2	Y	Y	N	Y	Y	N	N	N	N	N	N	Y	N	N
2017-01-09	106-075	Lu	H114	Yunlin	5	Nursery	123		4	Y	Y	N	Y	N	Y	N	Y	Y	N	N	Y	N	N
2017-01-10	106-081	MN	H115	Pingtung	5	Nursery	124		5	Y	Y	N	Y	Y	Y	Y	Y	Y	N	N	Y	N	N
2017-01-10	106-081	PL	H115	Pingtung	5				5		Y
2017-01-10	106-081	Lu	H115	Pingtung	5				5		Y
2017-01-10	106-083	PT	H116	Tainan	7	Nursery	125		MSNT group 2	Y	Y	N	Y	Y	Y	N	Y	Y	N	N	Y	N	N
2017-01-10	106-084	MN	H116	Tainan	7	Nursery			MSNT group 2	Y	Y	N	Y	Y	Y	N	Y	N	N	N	Y	N	N
2017-01-10	106-084	PC	H116	Tainan	7				MSNT group 2		Y
2017-01-10	106-085	MN	H116	Tainan	7	Nursery			MSNT group 2	Y	Y	Y	Y	Y	Y	N	Y	N	N	N	N	N	N
2017-01-11	106-094	Lu	H117	Pingtung	2	Suckling	126		5	Y	Y	Y	Y	Y	N	N	Y	Y	N	N	Y	N	N
2017-01-11	106-096	MN	H118	Pingtung	4	Nursery	127		5	Y	Y	Y	Y	Y	N	Y	Y	Y	N	N	Y	N	N
2017-01-11	106-096	PL	H118	Pingtung	4				5		Y
2017-01-11	106-096	PC	H118	Pingtung	4				5		Y
2017-01-11	106-096	PT	H118	Pingtung	4				5		Y
2017-01-11	106-096	JT	H118	Pingtung	4				5		Y
2017-01-11	106-096	Lu	H118	Pingtung	4				5		Y
2017-01-13	106-104	MN	H119	Pingtung	6	Nursery	128		MSNT group 2	Y	Y	Y	Y	Y	N	Y	Y	N	N	N	Y	Y	N
2017-01-13	106-104	PL	H119	Pingtung	6				MSNT group 2		Y
2017-01-13	106-104	JT	H119	Pingtung	6				MSNT group 2		Y
2017-02-15	106-293	Lu	H120	Yunlin	4	Nursery	129		MSNT group 1	Y	Y	N	Y	N	N	N	Y	Y	N	N	Y	N	N
2017-02-17	106-336	Lu	H121	Pingtung	5	Nursery	130		5	Y	Y	Y	Y	N	N	N	Y	Y	N	N	Y	N	N
2017-02-20	106-339	MN	H122	Pingtung	2	Suckling	131		MSNT group 2	Y	Y	Y	Y	Y	Y	Y	Y	Y	N	N	Y	N	N
2017-02-20	106-339	PT	H122	Pingtung	2				MSNT group 2		Y
2017-02-20	106-339	JT	H122	Pingtung	2				MSNT group 2		Y
2017-02-20	106-339	Lu	H122	Pingtung	2				MSNT group 2		Y
2017-02-20	106-340	PL	H122	Pingtung	3	Suckling			MSNT group 2	Y	Y	Y	Y	Y	Y	Y	Y	N	N	N	Y	N	N
2017-02-20	106-340	PC	H122	Pingtung	3				MSNT group 2		Y
2017-02-20	106-340	PT	H122	Pingtung	3				MSNT group 2		Y
2017-02-20	106-340	JT	H122	Pingtung	3				MSNT group 2		Y
2017-02-22	106-372	PL	H123	Pingtung	8	Nursery	132		4	Y	Y	Y	Y	Y	Y	Y	Y	N	N	N	Y	N	N
2017-02-23	106-378	Lu	H124	Yunlin	5	Nursery	133		MSNT group 1	Y	Y	Y	Y	N	N	Y	Y	Y	N	N	Y	N	N
